# Supplementary material for: Pulsed Electric Field-Assisted Extraction of Aroma and Bioactive Compounds From Aromatic Plants and Food By-Products
Source: PubMed Central journal article supplement (PMC8829011; doi:10.3389/fnut.2021.792203), 2022-01-27
Supplement: Image_1.pdf [file Image_1.pdf]

## SUPPLEMENTARY MATERIAL

### Pulsed electric field-assisted extraction of aroma and bioactive compounds from aromatic plants and food by-products

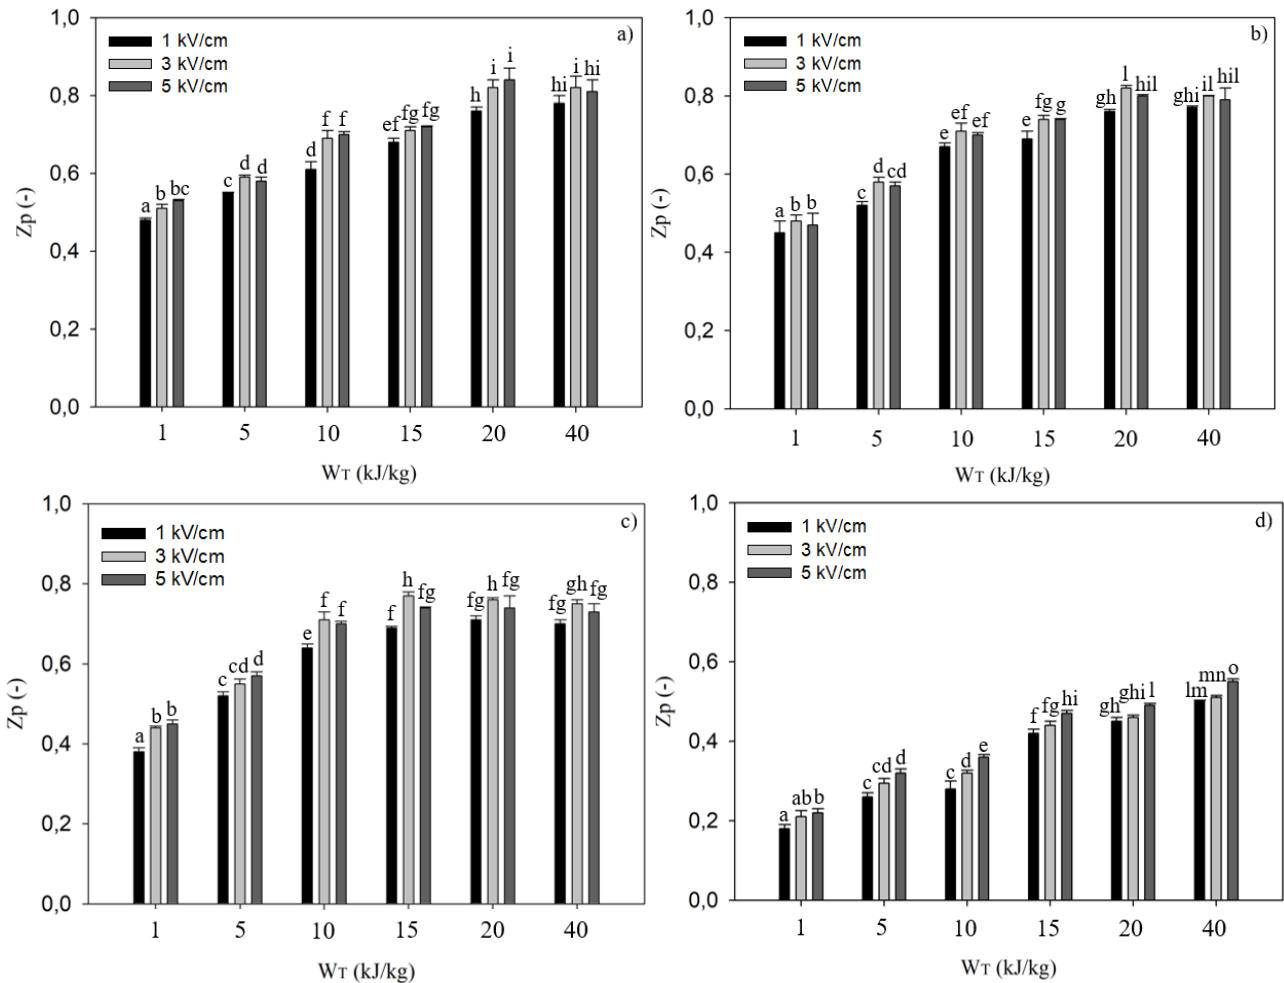

**Figure S1** Cell disintegration index ( $Z_p$ ) of vanilla pods (a), cocoa bean shells (b), vermouth mixture (c), and orange peels (d) as a function of electric field strength  $E$  (1, 3, 5 kV/cm) and total specific energy input  $W_T$  (1, 5, 10, 15, 20, 40 kJ/kg). Different letters above the bars indicate significant differences between the mean values ( $p \leq 0.05$ ).
